# Supplementary material for: Whole plant based treatment of hypercholesterolemia with Crataegus laevigata in a zebrafish model
Source: PubMed Central journal article supplement (PMC3479075; doi:10.1186/1472-6882-12-105), 2012-07-23
Supplement: 1472-6882-12-105-S1.pdf [file 1472-6882-12-105-S1.pdf]

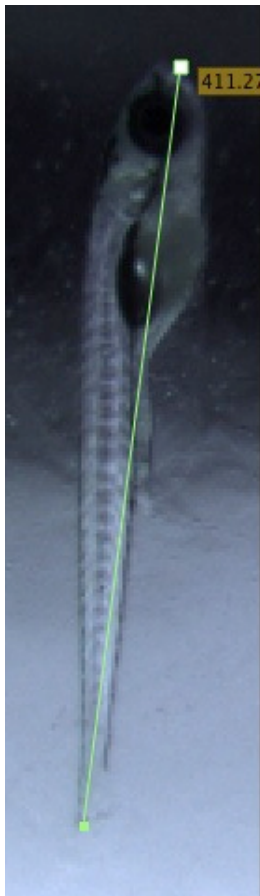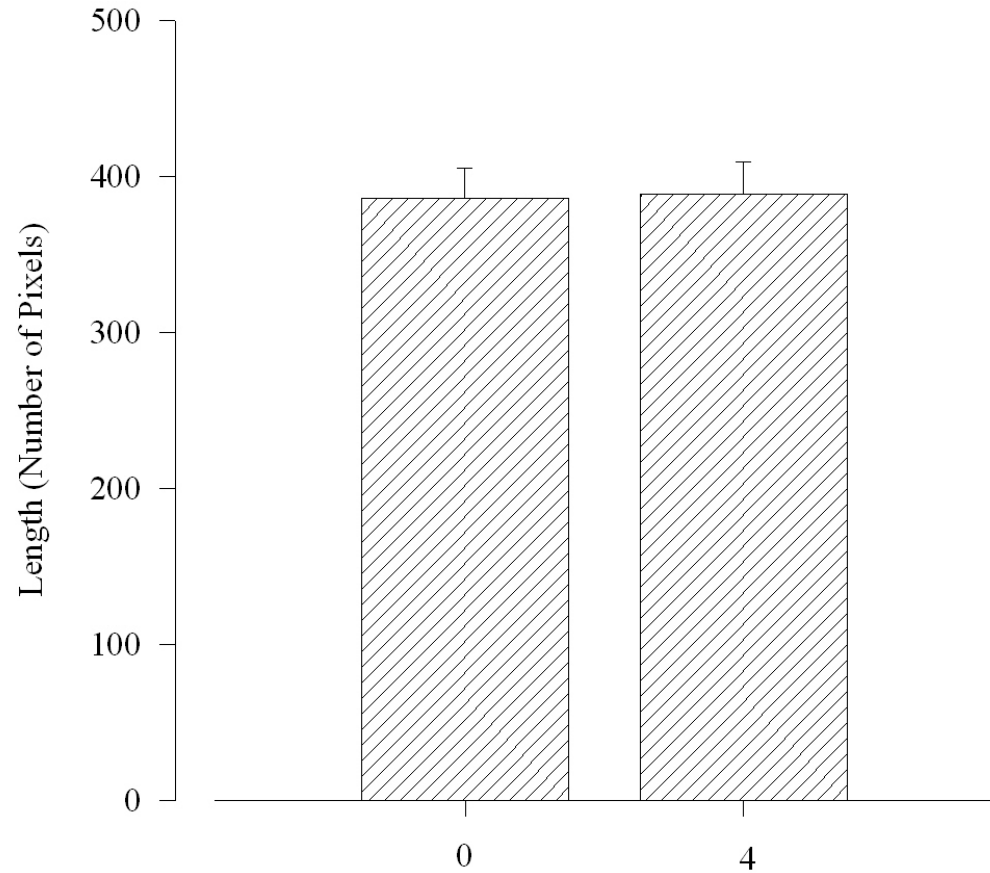

**Supplemental Figure.** A. Image of 18 dpf zebrafish with length measured in number of pixels. B. No difference detected between the length of 0% CH and 4% CH diet fed fish (n=8 individuals per group.  $P = 0.769$ . Student's t-test).
